# Supplementary material
Source: Research Square preprint supplement (doi:10.21203/rs.3.rs-8885139/v1)
Supplement: Supplementary file 1 [file dd33b9786b4ff18543ff2ddb.xlsx]

## Sheet: Table S1 - DE proteins HC
prot	median_non_sarco	median_sure_sarco	pval	padj	enriched in
NAAA	0.2755	0.0636	0.00934742	0.0367615	LS
ROBO2	0.264	0.0337	0.0077389	0.0323486	LS
ATP6V1D	0.2176	-0.0165	0.00119183	0.00917713	LS
FRZB	0.6296	0.3753	0.006383	0.0284705	LS
SELPLG	0.3241	0.0683	0.00429315	0.0212192	LS
ITGB1	0.382	0.1152	0.00474741	0.0226237	LS
ERBB2	0.2338	-0.0494	0.00850923	0.0346769	LS
PRTG	0.4595	0.1575	0.0112478	0.0418716	LS
CNTN4	0.1779	-0.1495	0.00255951	0.0149186	LS
LAMP2	0.2885	-0.0484	0.00474741	0.0226237	LS
ITGB5	1.1329	0.7952	0.00474741	0.0226237	LS
EGFR	0.3805	0.0346	0.0020673	0.0130364	LS
ITGAM	0.498	0.1482	0.00429315	0.0212192	LS
DNER	-0.0377	-0.3965	0.00429315	0.0212192	LS
MASP1	0.6776	0.312	0.000596169	0.0054855	LS
PLXDC1	0.2845	-0.0947	0.00850923	0.0346769	LS
CD34	0.1941	-0.1852	0.0081118	0.0338107	LS
WAS	0.3734	-0.0072	0.0112478	0.0418716	LS
L1CAM	0.426	0.0442	0.0102536	0.0395995	LS
DPP4	0.1934	-0.2228	0.00148986	0.0104791	LS
CES3	-1.1346	-1.5622	0.00934742	0.0367615	LS
LY75	0.5463	0.1023	0.00133318	0.00985073	LS
GALNT7	0.585	0.1299	0.00166334	0.0113185	LS
ITGAV	0.3017	-0.1585	6.92531e-05	0.0013509	LS
CDON	0.0535	-0.4222	0.00850923	0.0346769	LS
CNTN5	-0.2042	-0.6981	0.00041581	0.00441197	LS
ADAMTS13	-0.4402	-0.9538	2.62878e-05	0.000938027	LS
LRRN1	0.0425	-0.5013	0.000325904	0.00369611	LS
PBLD	-0.0185	-0.5632	0.0077389	0.0323486	LS
CES2	0.0004	-0.5472	0.00148881	0.0104791	LS
ADAMTS8	0.0764	-0.4943	0.00387865	0.0196348	LS
FCRL1	0.0313	-0.5498	0.000416167	0.00441197	LS
FASLG	-0.2567	-0.8555	0.0134838	0.0473064	LS
CNTN3	0.2639	-0.3444	2.39527e-06	0.000521423	LS
CA6	-1.1951	-1.8196	0.00773496	0.0323486	LS
CD22	0.611	-0.034	0.00387865	0.0196348	LS
GSTA3	0.1128	-0.5361	0.000596169	0.0054855	LS
MVK	0.8419	0.1898	0.0102585	0.0395995	LS
PAMR1	1.0371	0.3601	0.000254228	0.00320633	LS
TNFSF11	-0.5976	-1.275	0.00166334	0.0113185	LS
NELL1	-0.1117	-0.8053	0.00703166	0.0304358	LS
WFIKKN1	0.6059	-0.0889	0.00284388	0.0160023	LS
ASAH2	0.254	-0.4813	0.000529367	0.00502899	LS
ITGB7	0.9286	0.1817	0.00185524	0.0120098	LS
CBLN4	0.4432	-0.3095	6.04153e-05	0.00128238	LS
GPC5	0.1019	-0.6545	0.000469595	0.00467358	LS
CR2	0.0214	-0.754	0.00185524	0.0120098	LS
CTRC	0.6293	-0.181	0.0112478	0.0418716	LS
CRNN	0.6716	-0.1548	0.00255951	0.0149186	LS
DCXR	0.516	-0.3169	0.00119183	0.00917713	LS
CNDP1	-0.9693	-1.8109	0.000469595	0.00467358	LS
SERPINA9	0.4729	-0.4861	0.00703166	0.0304358	LS
NPY	2.07	1.068	0.0102585	0.0395995	LS
ITGA11	0.2212	-0.817	6.05892e-06	0.000521423	LS
MDGA1	1.0966	-0.1759	0.00350084	0.01849	LS
CRH	-0.7566	-2.0399	0.000287984	0.00339774	LS
GSTA1	-0.2	-1.4999	0.000753931	0.0064503	LS
MSTN	0.472	-0.9066	0.000152899	0.00223691	LS
ADH4	0.1951	-1.2109	0.00133318	0.00985073	LS
LEP	1.5036	-0.0645	0.00524476	0.0241292	LS
TCL1A	1.8419	0.2718	0.00284388	0.0160023	LS
MEP1B	0.5587	-1.2771	0.00524476	0.0241292	LS
SSC4D	0.4429	-1.5874	0.00148986	0.0104791	LS
GPA33	1.248	-0.8413	0.00230138	0.0138556	LS
IGFBP1	-0.2046	2.03	0.0077389	0.0323486	HS
DPY30	1.3959	3.6138	2.04491e-06	0.000521423	HS
IL6	2.7154	4.9163	0.000753931	0.0064503	HS
GH1	3.7017	5.8648	0.000173878	0.00239985	HS
SPINK1	0.5958	2.657	4.59947e-05	0.00116018	HS
FKBP5	1.4	3.4193	3.2766e-06	0.000521423	HS
RRM2	0.8038	2.6711	0.000325904	0.00369611	HS
BRK1	0.8158	2.6453	0.000224209	0.00292874	HS
VSIG4	0.9703	2.7879	2.80288e-06	0.000521423	HS
TMSB10	1.2329	2.9923	2.62878e-05	0.000938027	HS
MAD1L1	1.815	3.5384	1.27772e-05	0.000890146	HS
PSIP1	1.5808	3.2717	0.000469595	0.00467358	HS
CXCL11	0.8895	2.5396	0.00524476	0.0241292	HS
SDC1	1.204	2.8248	5.27689e-05	0.00120626	HS
IL17C	0.5029	2.0967	0.000529367	0.00502899	HS
KLK4	1.5766	3.1575	0.000846608	0.00707764	HS
REG3A	0.816	2.3879	0.000287984	0.00339774	HS
EIF4G1	2.3485	3.8994	0.000416167	0.00441197	HS
EDA2R	0.924	2.4691	0.000173878	0.00239985	HS
CXCL8	1.1941	2.7335	2.62878e-05	0.000938027	HS
MMP1	1.0306	2.5464	0.00166334	0.0113185	HS
KRT19	2.6383	4.1513	6.92531e-05	0.0013509	HS
GRPEL1	1.9312	3.3737	0.00013432	0.00204698	HS
CDH3	0.4243	1.8465	0.000103356	0.00173805	HS
KRT18	1.283	2.7008	0.00255951	0.0149186	HS
CKAP4	1.0485	2.4614	1.27772e-05	0.000890146	HS
EPO	0.8894	2.3017	0.00255951	0.0149186	HS
CXCL1	0.8986	2.2837	2.62878e-05	0.000938027	HS
NTproBNP	1.558	2.9407	0.00474741	0.0226237	HS
TNFRSF11A	0.5735	1.9495	3.82659e-06	0.000521423	HS
CD177	-0.5457	0.8168	0.00185524	0.0120098	HS
JUN	-0.1566	1.2056	1.10277e-05	0.000849136	HS
LIF	-0.2996	1.0416	0.00524476	0.0241292	HS
ZBTB17	1.0477	2.373	6.92531e-05	0.0013509	HS
DKK1	0.8613	2.1848	0.000103356	0.00173805	HS
HMOX2	0.6668	1.9858	6.04814e-05	0.00128238	HS
BST2	0.8781	2.1924	0.0077389	0.0323486	HS
CXCL5	1.7262	3.0362	0.0134838	0.0473064	HS
LAT	0.3657	1.6565	0.00166334	0.0113185	HS
NEFL	1.7047	2.9952	0.000469595	0.00467358	HS
SPINK4	1.5606	2.8399	0.0077389	0.0323486	HS
TNFRSF12A	0.3655	1.6384	4.59947e-05	0.00116018	HS
TXLNA	1.4265	2.675	0.000152899	0.00223691	HS
NPPB	1.5588	2.793	0.00934742	0.0367615	HS
IL4R	1.0102	2.2419	6.92531e-05	0.0013509	HS
MDK	1.3937	2.6252	6.05892e-06	0.000521423	HS
TRIAP1	0.5207	1.731	2.04491e-06	0.000521423	HS
ATP5IF1	0.1206	1.3225	1.74406e-06	0.000521423	HS
FKBP4	1.2347	2.4358	0.000753931	0.0064503	HS
HAVCR2	0.6099	1.8097	3.82659e-06	0.000521423	HS
NECTIN4	0.5641	1.7598	0.000254228	0.00320633	HS
CCL20	0.4863	1.6816	0.0020673	0.0130364	HS
LBR	0.9398	2.132	3.48406e-05	0.000980228	HS
GPR37	1.7971	2.9862	0.00106445	0.00841776	HS
MPHOSPH8	0.3487	1.531	5.27689e-05	0.00120626	HS
CD27	0.1594	1.34	0.000287984	0.00339774	HS
PARP1	2.8432	4.0193	0.00230138	0.0138556	HS
STC1	0.8161	1.9892	0.00474741	0.0226237	HS
ULBP2	0.8744	2.0406	0.000325904	0.00369611	HS
CCL5	2.2101	3.3755	0.0077389	0.0323486	HS
CKMT1A_CKMT1B	-0.2834	0.8731	0.000469595	0.00467358	HS
CD79B	0.6046	1.7486	0.00133318	0.00985073	HS
BAIAP2	0.5992	1.7393	0.000596169	0.0054855	HS
CALB1	0.4004	1.5265	0.0020673	0.0130364	HS
SIGLEC5	1.3002	2.4204	0.00013432	0.00204698	HS
IGFBP2	1.1673	2.2843	3.48406e-05	0.000980228	HS
TNFRSF6B	1.5	2.6126	0.00036846	0.00405306	HS
IL10	-5.8523	-4.7448	0.000469595	0.00467358	HS
POLR2F	0.653	1.7564	2.39527e-06	0.000521423	HS
IL2RA	1.0573	2.1513	0.000103356	0.00173805	HS
GDF15	1.7482	2.842	5.27104e-05	0.00120626	HS
PAG1	0.0058	1.0937	6.04814e-05	0.00128238	HS
METAP1D	0.5946	1.6765	0.000753931	0.0064503	HS
CCL3	0.9681	2.0474	0.00036846	0.00405306	HS
TNFRSF1B	0.431	1.5074	1.47896e-05	0.000893584	HS
HSPA1A	0.1187	1.1943	0.000254228	0.00320633	HS
TNFRSF1A	0.8019	1.8677	1.71021e-05	0.000893584	HS
CHI3L1	2.0976	3.1603	0.00474741	0.0226237	HS
TXNDC5	0.6168	1.6794	1.10277e-05	0.000849136	HS
HEXIM1	1.5314	2.5896	0.00148986	0.0104791	HS
TNFRSF10B	1.1942	2.245	2.62878e-05	0.000938027	HS
EPHA2	0.9109	1.9585	3.48406e-05	0.000980228	HS
IL1RL1	0.4477	1.4896	6.05892e-06	0.000521423	HS
MZB1	0.5459	1.5774	0.00255951	0.0149186	HS
ICA1	0.8634	1.8936	4.00507e-05	0.00110555	HS
LILRB4	1.4098	2.4385	0.000173878	0.00239985	HS
SPP1	1.0521	2.0782	0.000103356	0.00173805	HS
LTBP2	0.7435	1.7679	4.59947e-05	0.00116018	HS
VWA1	1.0882	2.1065	0.00350084	0.01849	HS
DBI	0.9169	1.9319	5.27689e-05	0.00120626	HS
CDKN1A	1.3363	2.3383	0.00387865	0.0196348	HS
BAX	0.972	1.9613	0.000529367	0.00502899	HS
IL7	0.8847	1.8737	0.000224209	0.00292874	HS
FCRLB	0.6452	1.6251	0.00350084	0.01849	HS
SCAMP3	0.7967	1.7751	0.000325904	0.00369611	HS
WFDC2	1.2651	2.243	3.48406e-05	0.000980228	HS
NECTIN2	0.813	1.7875	2.28007e-05	0.000938027	HS
CD276	0.5747	1.5398	0.000529367	0.00502899	HS
COX5B	-0.1587	0.8061	0.00036846	0.00405306	HS
CCL15	0.6424	1.6013	6.05892e-06	0.000521423	HS
PLA2G2A	2.514	3.4614	0.0134838	0.0473064	HS
CD300C	0.3066	1.252	0.000197543	0.00267598	HS
ENAH	0.8533	1.798	6.05892e-06	0.000521423	HS
DLL1	0.4885	1.42	0.00067075	0.00594732	HS
LTBR	0.4261	1.3553	6.04814e-05	0.00128238	HS
GFRA1	0.9712	1.8998	1.97566e-05	0.000932385	HS
ATOX1	1.4404	2.3647	0.000529367	0.00502899	HS
MILR1	0.156	1.0795	0.00119183	0.00917713	HS
CLEC1B	0.3253	1.2486	0.000173878	0.00239985	HS
NBN	-0.2524	0.6586	4.59947e-05	0.00116018	HS
SPON2	0.5724	1.4707	2.62878e-05	0.000938027	HS
DNMBP	0.7641	1.6533	0.000469595	0.00467358	HS
LAYN	0.6892	1.576	0.00067075	0.00594732	HS
PQBP1	0.6809	1.5669	0.000325904	0.00369611	HS
SIGLEC10	0.7026	1.5865	0.000117883	0.00185444	HS
CSF1	0.6822	1.5655	1.97566e-05	0.000932385	HS
TGFA	0.5231	1.4058	1.71021e-05	0.000893584	HS
WISP1	0.8041	1.679	7.92193e-05	0.00144872	HS
TFF3	0.8243	1.695	0.000416167	0.00441197	HS
SLC39A14	0.9295	1.7989	3.48406e-05	0.000980228	HS
TNFRSF14	0.2864	1.1508	6.92531e-05	0.0013509	HS
CTSB	0.3683	1.2288	0.00148986	0.0104791	HS
CLEC7A	0.3206	1.1747	0.00067075	0.00594732	HS
HTRA2	0.0539	0.9072	0.00429315	0.0212192	HS
SERPINE1	-0.2735	0.579	0.0112478	0.0418716	HS
REG1B	0.6338	1.4862	0.00429315	0.0212192	HS
EFNA1	0.6806	1.5324	9.05308e-05	0.00159574	HS
TIMP1	0.8374	1.6891	3.02785e-05	0.000962988	HS
ELOA	1.3634	2.2147	0.00148986	0.0104791	HS
DAB2	0.7475	1.597	0.000949758	0.00771942	HS
TNFRSF8	0.6016	1.4508	0.00429315	0.0212192	HS
TNC	0.7891	1.6375	0.00474741	0.0226237	HS
MAPK9	0.773	1.6192	0.00387865	0.0196348	HS
CD300E	0.6337	1.4798	0.00524476	0.0241292	HS
CSTB	1.139	1.983	9.05308e-05	0.00159574	HS
CD300LF	0.964	1.8061	0.00148986	0.0104791	HS
TNFRSF10A	1.0153	1.8494	0.000117883	0.00185444	HS
CRELD2	0.7274	1.5584	0.000753931	0.0064503	HS
NDUFS6	-0.4646	0.3645	3.2766e-06	0.000521423	HS
TARBP2	1.1282	1.9547	0.000287984	0.00339774	HS
CD40	0.2967	1.1214	0.000117883	0.00185444	HS
SPINT2	0.5776	1.3969	1.71021e-05	0.000893584	HS
VEGFA	1.0494	1.8666	4.46447e-06	0.000521423	HS
PLIN3	0.8085	1.6234	6.92531e-05	0.0013509	HS
C4BPB	0.9727	1.7875	0.0123209	0.0448396	HS
LBP	2.1067	2.9175	0.00524476	0.0241292	HS
PTK7	0.34	1.1495	0.000173878	0.00239985	HS
PREB	-0.0523	0.7549	2.62878e-05	0.000938027	HS
PTX3	1.4904	2.2963	0.000949758	0.00771942	HS
PRTN3	0.4412	1.2432	0.00185524	0.0120098	HS
TBL1X	0.6122	1.4101	0.00350084	0.01849	HS
CXADR	1.2444	2.0417	0.00230138	0.0138556	HS
EPHB4	0.5628	1.3594	6.05892e-06	0.000521423	HS
PDGFA	0.2884	1.0831	0.0077389	0.0323486	HS
GFAP	0.6568	1.448	0.0020673	0.0130364	HS
PLAUR	0.729	1.5181	3.02785e-05	0.000962988	HS
F11R	0.2913	1.077	7.92193e-05	0.00144872	HS
ING1	-0.731	0.044	9.05308e-05	0.00159574	HS
ACTA2	0.4799	1.2527	0.000117883	0.00185444	HS
PFDN2	0.2948	1.0668	0.00524476	0.0241292	HS
NUDC	1.1718	1.9367	3.48406e-05	0.000980228	HS
CDCP1	1.648	2.4128	0.00119183	0.00917713	HS
GP6	-0.1206	0.6437	0.000152899	0.00223691	HS
MAVS	0.5166	1.2765	0.00332275	0.0182751	HS
PRDX3	0.6614	1.4186	0.0077389	0.0323486	HS
DCTPP1	0.888	1.644	0.00067075	0.00594732	HS
BLMH	0.2904	1.0456	0.0134838	0.0473064	HS
B4GALT1	0.4473	1.2006	5.27689e-05	0.00120626	HS
SIGLEC1	0.7654	1.5181	0.00185524	0.0120098	HS
GPKOW	0.6184	1.3703	1.97566e-05	0.000932385	HS
MMP13	0.1636	0.913	0.00166334	0.0113185	HS
RELT	0.6771	1.4263	0.000287984	0.00339774	HS
SIRPB1	0.6744	1.4195	0.000469595	0.00467358	HS
LAIR1	0.4736	1.2173	0.000287984	0.00339774	HS
PSG1	-0.6364	0.1061	0.00703166	0.0304358	HS
LRIG1	0.7763	1.518	0.00284388	0.0160023	HS
PDLIM7	0.2171	0.9544	7.92193e-05	0.00144872	HS
IL17RB	0.3979	1.1342	0.00315682	0.017494	HS
HPCAL1	0.5111	1.2461	0.006383	0.0284705	HS
F2R	0.1267	0.8579	5.27689e-05	0.00120626	HS
ABL1	0.9158	1.6469	0.000173878	0.00239985	HS
MCFD2	0.6186	1.3405	2.28007e-05	0.000938027	HS
PPP1R2	0.586	1.3072	3.02785e-05	0.000962988	HS
CD74	0.9678	1.6787	0.000287984	0.00339774	HS
DSC2	0.7974	1.5041	0.000117883	0.00185444	HS
NPDC1	0.9988	1.7047	0.000949758	0.00771942	HS
PRL	0.5468	1.2514	0.00524476	0.0241292	HS
SRP14	1.1132	1.8171	0.000441752	0.00464952	HS
REG1A	0.4457	1.1485	0.00850923	0.0346769	HS
FXN	0.7817	1.4792	0.0134838	0.0473064	HS
ESAM	0.1174	0.8104	3.02785e-05	0.000962988	HS
SMOC1	0.1316	0.8246	0.00230138	0.0138556	HS
NUCB2	0.6994	1.3916	0.000152899	0.00223691	HS
GFER	0.5197	1.2113	0.00703166	0.0304358	HS
LRP11	0.5395	1.2306	0.00133318	0.00985073	HS
FSTL3	0.8994	1.5893	0.000596169	0.0054855	HS
ANXA5	0.2695	0.9571	1.47896e-05	0.000893584	HS
CPXM1	0.1107	0.797	0.00106445	0.00841776	HS
PXN	1.0147	1.6965	0.0112478	0.0418716	HS
STX4	0.4665	1.1412	7.92193e-05	0.00144872	HS
PILRB	0.9177	1.5846	0.000287984	0.00339774	HS
RETN	0.3794	1.0448	0.0123209	0.0448396	HS
PILRA	0.7708	1.4302	0.000224209	0.00292874	HS
LCN2	0.4609	1.1174	0.00429315	0.0212192	HS
ITIH3	0.7992	1.4483	1.71021e-05	0.000893584	HS
SCARB2	0.7993	1.4476	0.00387865	0.0196348	HS
PRKAB1	-0.0022	0.6451	0.00148986	0.0104791	HS
TREM2	1.2485	1.8955	0.00185524	0.0120098	HS
CCN2	0.6619	1.3086	0.000224209	0.00292874	HS
SAMD9L	0.9039	1.5495	0.0102585	0.0395995	HS
FUS	0.5971	1.2412	3.02785e-05	0.000962988	HS
CLPP	0.5042	1.1477	0.000529367	0.00502899	HS
PDCD5	1.7888	2.4318	0.0123209	0.0448396	HS
LGALS9	0.9024	1.5442	0.000416167	0.00441197	HS
EFNA4	0.7861	1.426	0.00133318	0.00985073	HS
CA12	0.5091	1.1478	0.000949758	0.00771942	HS
EBI3_IL27	0.8245	1.4622	0.00133318	0.00985073	HS
SLC27A4	0.0048	0.6371	0.0123209	0.0448396	HS
PTPN1	1	1.6309	0.0134838	0.0473064	HS
DFFA	1.7036	2.3305	0.00703166	0.0304358	HS
ST3GAL1	-0.5106	0.1155	0.00474741	0.0226237	HS
CD14	1.4025	2.0284	0.000846608	0.00707764	HS
IL18BP	0.5454	1.1636	0.000846608	0.00707764	HS
SCARF1	0.5046	1.1226	4.59947e-05	0.00116018	HS
CCL14	1.1032	1.7166	0.00166334	0.0113185	HS
DCBLD2	0.4989	1.1058	0.00255951	0.0149186	HS
CCL2	0.5776	1.1803	0.00315682	0.017494	HS
SCARF2	0.4954	1.0956	0.00255951	0.0149186	HS
CCL4	0.3498	0.9488	0.0057887	0.0262194	HS
NID2	0.0442	0.6411	0.00185524	0.0120098	HS
NUDT5	1.0843	1.6811	0.00387865	0.0196348	HS
TDRKH	0.562	1.1583	0.000529367	0.00502899	HS
PGF	0.7837	1.379	0.00230138	0.0138556	HS
IRAK1	0.9167	1.5062	0.0020673	0.0130364	HS
NDRG1	-0.5295	0.0561	0.00850923	0.0346769	HS
MAX	-0.037	0.5481	0.00934742	0.0367615	HS
SCRN1	0.9216	1.5067	0.00185524	0.0120098	HS
IL1R1	0.6945	1.2786	0.000117883	0.00185444	HS
CLEC5A	0.9452	1.5286	0.00387865	0.0196348	HS
CSF3	1.2707	1.8485	0.00255951	0.0149186	HS
CLEC1A	0.8754	1.4526	0.00185524	0.0120098	HS
RCOR1	0.4893	1.0641	0.000949758	0.00771942	HS
MATN3	0.9734	1.5428	0.000596169	0.0054855	HS
PLA2G10	0.9455	1.5132	0.0077389	0.0323486	HS
VCAN	0.5164	1.0806	0.00185524	0.0120098	HS
PTPRF	0.5095	1.0727	0.00166334	0.0113185	HS
GYS1	0.554	1.11	0.0134838	0.0473064	HS
STX8	-0.5306	0.0246	0.0057887	0.0262194	HS
CCL8	-3.4128	-2.8583	0.00934742	0.0367615	HS
ST6GAL1	1.3762	1.9302	0.00133318	0.00985073	HS
GAS6	0.2229	0.7761	0.00119183	0.00917713	HS
SERPINB6	0.3467	0.8985	0.000134186	0.00204698	HS
BCL2L11	0.8345	1.3861	0.000753931	0.0064503	HS
IL15	0.8557	1.406	0.00133318	0.00985073	HS
STX6	-0.1022	0.4447	0.00332275	0.0182751	HS
LILRB2	0.8169	1.3612	0.00284388	0.0160023	HS
IGFBP4	1.4365	1.979	0.00284388	0.0160023	HS
IL12RB1	0.7466	1.2881	0.0134838	0.0473064	HS
APP	0.1776	0.7187	0.00106445	0.00841776	HS
EGLN1	0.914	1.4539	0.0123209	0.0448396	HS
DIABLO	0.4618	1.0007	0.0020673	0.0130364	HS
YES1	0.8242	1.3604	0.00185524	0.0120098	HS
CLEC14A	0.344	0.8762	0.00474741	0.0226237	HS
PPIB	0.6479	1.1742	0.00703166	0.0304358	HS
ASGR1	0.885	1.4093	0.0102585	0.0395995	HS
IL10RB	0.6276	1.1506	0.00230138	0.0138556	HS
THBD	0.0979	0.6189	0.0057887	0.0262194	HS
SPON1	0.4558	0.975	0.00350084	0.01849	HS
THBS2	0.9405	1.4585	0.00106445	0.00841776	HS
TGFB1	0.8289	1.3463	0.000846608	0.00707764	HS
ESM1	1.4253	1.9407	0.0134838	0.0473064	HS
EBAG9	0.9572	1.4708	0.00230138	0.0138556	HS
NINJ1	0.1456	0.6576	0.00230138	0.0138556	HS
CRIM1	0.5275	1.0385	2.28007e-05	0.000938027	HS
VCAM1	0.384	0.8924	0.0057887	0.0262194	HS
TNFRSF21	0.4747	0.9821	0.0117681	0.0436973	HS
SORCS2	0.5023	1.0095	0.006383	0.0284705	HS
FOLR2	0.5596	1.0632	0.0123209	0.0448396	HS
PIK3IP1	0.4263	0.9294	0.00934742	0.0367615	HS
ICAM2	0.6787	1.1812	0.00350084	0.01849	HS
AGRN	0.8809	1.383	0.0134838	0.0473064	HS
BTN3A2	1.2747	1.7737	0.0134838	0.0473064	HS
TNFSF13	0.9608	1.4468	0.00067075	0.00594732	HS
TBC1D5	0.6389	1.1236	0.00230138	0.0138556	HS
EZR	0.6324	1.1145	0.00148986	0.0104791	HS
ERBIN	0.2791	0.7608	0.00350084	0.01849	HS
TRIM5	0.6375	1.112	0.0134838	0.0473064	HS
LILRA5	0.8132	1.2862	0.0112478	0.0418716	HS
PPP1R9B	0.7324	1.2023	0.0112478	0.0418716	HS
CTSL	0.4674	0.932	0.000197543	0.00267598	HS
ADM	0.9884	1.4463	6.04814e-05	0.00128238	HS
CASC4	0.7274	1.1851	0.00315682	0.017494	HS
TXNDC15	0.2734	0.7239	0.000253994	0.00320633	HS
BSG	0.1403	0.5872	0.00036846	0.00405306	HS
CLTA	0.3646	0.7987	7.92193e-05	0.00144872	HS
FCGR2A	0.559	0.9879	0.00387865	0.0196348	HS
IGSF8	0.5989	1.026	0.00387865	0.0196348	HS
CA13	0.3701	0.7938	0.0134838	0.0473064	HS
CAPG	0.5698	0.9922	0.00284388	0.0160023	HS
FCAR	0.8933	1.3134	0.0102585	0.0395995	HS
S100A11	0.9521	1.3697	0.00934742	0.0367615	HS
PI3	0.8003	1.2137	0.00703166	0.0304358	HS
IFNGR1	0.2072	0.6169	0.0057887	0.0262194	HS
RSPO3	0.5318	0.9415	0.00284388	0.0160023	HS
CST3	0.959	1.3686	0.00387865	0.0196348	HS
SERPINB1	0.5022	0.9103	0.00350084	0.01849	HS
CD93	0.2673	0.6708	0.00891514	0.0362302	HS
PODXL2	0.3272	0.7304	0.0112478	0.0418716	HS
ARTN	-0.4338	-0.0338	0.00934742	0.0367615	HS
CD302	0.6284	1.0282	0.00524476	0.0241292	HS
HLA-E	0.7836	1.1822	0.00474741	0.0226237	HS
VSTM1	0.3663	0.764	0.0112478	0.0418716	HS
PVR	1.1461	1.5423	0.00703166	0.0304358	HS
VEGFC	0.4199	0.8121	0.00524476	0.0241292	HS
STK24	0.1788	0.5643	0.00934742	0.0367615	HS
DSG2	0.1477	0.5322	0.00067075	0.00594732	HS
DCTN2	0.789	1.1688	0.00350084	0.01849	HS
PADI2	-0.6835	-0.3046	0.00350084	0.01849	HS
C1QA	0.496	0.8731	1.47896e-05	0.000893584	HS
HSPB6	-0.1188	0.2573	0.00850923	0.0346769	HS
SLAMF6	0.4648	0.8404	0.0134838	0.0473064	HS
SLC16A1	-0.583	-0.2086	0.0112426	0.0418716	HS
CD274	1.0495	1.4217	0.0123209	0.0448396	HS
MANSC1	0.1783	0.5466	0.00284388	0.0160023	HS
TINAGL1	0.798	1.1653	0.00106445	0.00841776	HS
VIM	0.066	0.4317	0.0112478	0.0418716	HS
DTX3	0.8275	1.191	0.00387865	0.0196348	HS
GSTP1	-0.3181	0.0371	0.00703166	0.0304358	HS
SERPINA11	1.3128	1.6662	0.0112478	0.0418716	HS
PDGFRA	0.3087	0.662	0.0112478	0.0418716	HS
ATP6AP2	0.0867	0.4394	0.00850923	0.0346769	HS
LGALS8	0.474	0.8221	0.00315682	0.017494	HS
CDH1	0.0379	0.3792	0.00230138	0.0138556	HS
IL15RA	0.3254	0.6576	0.00524476	0.0241292	HS
PPP3R1	0.5139	0.8454	0.0123209	0.0448396	HS
CCL28	1.5141	1.844	0.00850923	0.0346769	HS
FAM3C	0.5258	0.8523	0.0112478	0.0418716	HS
CDC27	-0.1797	0.1438	0.006383	0.0284705	HS
DCN	0.0939	0.4135	0.00387865	0.0196348	HS
CXCL16	0.6422	0.9583	0.00934742	0.0367615	HS
MAPT	0.4074	0.7212	0.00284388	0.0160023	HS
CD46	0.4077	0.7165	0.00703166	0.0304358	HS
NBL1	0.4542	0.755	0.00934742	0.0367615	HS
DDR1	0.3782	0.6705	0.006383	0.0284705	HS
VEGFD	0.341	0.6315	0.0077389	0.0323486	HS
CD59	0.4023	0.6783	0.00148986	0.0104791	HS
THPO	1.1405	1.4056	0.0102585	0.0395995	HS
MED18	0.6974	0.9598	0.00934742	0.0367615	HS
ACTN4	-0.0712	0.1797	0.00350084	0.01849	HS
HYOU1	0.4939	0.7285	0.00229988	0.0138556	HS
NID1	0.7859	1.0183	0.0134838	0.0473064	HS
HBEGF	-0.9485	-0.7314	0.00474741	0.0226237	HS
NRP1	0.6403	0.8448	0.0077389	0.0323486	HS

## Sheet: Table S2 - signature proteins
Protein	Main function	Tissue/system	Reason for inclusion/exclusion
MSTN	Regulator of skeletal muscle growth	Muscle	Involved in muscle biology
PAMR1	Muscle regeneration-associated	Muscle	Involved in muscle repair
CBLN4	Synaptic organizer	Neuronal	Reflects neuronal integrity
CNTN3	Neuronal adhesion molecule	Neuronal	Maintains synaptic connectivity
CNTN5	Neuronal adhesion molecule	Neuronal	Same rationale as CNTN3
PLXDC1	Plexin domain-containing protein; vascular/satellite cell marker	Muscle/endothelium	Role in muscle angiogenesis and regeneration
LRRN1	Neuronal adhesion, expressed in muscle satellite cells	Muscle/neuronal	Potential link between NMJ and myogenesis
ITGB1	ECM receptor (integrin)	Muscle	Role in differentiation and adhesion of myoblasts
ITGAV	ECM receptor	Muscle	Regulates myoblast fusion and differentiation
LAMP2	Lysosomal membrane	Muscle	Autophagy, altered in muscle wasting
WFIKKN1	Myostatin inhibitor	Muscle	Protects against muscle loss
CD34	Satellite cell marker	Muscle	Muscle regeneration
DPP4	Myokine/protease	Muscle/metabolic	Secreted by muscle, regulates metabolism
GPC5	Heparan sulfate proteoglycan	Muscle/ECM	ECM regulation and muscle signaling
IDS	Lysosomal enzyme	Ubiquitous	General degradation pathway, nonspecific
CNDP1	Carnosinase	Muscle metabolism	Relevant for muscle oxidative stress
ITGB5	Integrin subunit	Muscle	ECM–cell signaling
ITGA11	Integrin subunit	Muscle/fibroblast	ECM adhesion
CDON	Co-receptor of SHH, muscle differentiation	Muscle	Upregulated in differentiating myoblasts
ROBO2	Axon guidance receptor	Neuronal	Possible NMJ regulation
L1CAM	Adhesion molecule	Neuronal	Synaptic formation, axon guidance
MDGA1	Synaptic adhesion	Neuronal	Neuromuscular synapse formation
CBLN4	Synaptic organizer	Neuronal	Reflects neuronal activity and NMJ integrity
								145.5
								Table S2

## Sheet: Table S3 - mediators
protein name	p val MR-immuno	correlation coefficient MR-immuno	fdr p val MR-immuno	p val MR prostate	correlation coefficient MR prostate	fdr p val MR prostate	p val trx_BL	correlation coeffidient trx_BL	fdr_w_pval_trx_BL	p val trx_	correlation coefficient trx_relapse	fdr p val trx_
IGFBP2	1.97526e-07	0.494448	5.66629e-06	1.06538e-05	0.450431	0.000520773	9.38687e-05	0.317577	0.0010238	4.36168e-05	0.366971	0.0012623
IL6	2.02938e-10	0.585042	1.56262e-08	0.000633437	0.35725	0.0115622	0.000282016	0.296297	0.00242451	0.00170349	0.28583	0.0184418
IGFBP1	0.000385828	0.349848	0.00240199	0.000670069	0.355753	0.012154	4.00756e-05	0.33301	0.000509308	9.18866e-05	0.352187	0.00229559
ITIH3	1.52387e-09	0.561171	8.91769e-08	9.0606e-05	0.405043	0.00287151	0.000684238	0.277873	0.00493834	6.92123e-05	0.357895	0.00183598
SLC39A14	7.66825e-09	0.540571	3.61892e-07	0.00336125	0.309334	0.0412504	0.00107889	0.267893	0.00711871	0.000148071	0.342322	0.00298491
PTX3	1.95758e-07	0.494586	5.66629e-06	0.000323797	0.374581	0.0068664	0.00398161	0.236952	0.0207826	0.00218679	0.279365	0.0215218
VSIG4	8.03286e-11	0.595401	8.39434e-09	0.000311858	0.375523	0.00676715	0.0932154	0.139447	0.244147	2.84921e-06	0.415713	0.00014175
IL1RL1	1.06889e-10	0.592247	9.69119e-09	0.00474935	0.29837	0.0520803	0.473948	0.0597228	0.668605	0.000140121	0.34348	0.00289281
SDC1	3.21225e-06	0.448598	5.23957e-05	0.000288572	0.377461	0.00666848	0.139046	0.123024	0.319772	0.0131441	0.227705	0.0683631
GRPEL1	1.38488e-07	0.499835	4.60471e-06	0.00720294	0.284588	0.0705278	0.0782132	0.146226	0.214262	0.000874452	0.302389	0.010995
TRIAP1	1.71665e-07	0.496588	5.12542e-06	0.0195849	0.248464	0.134483	0.267576	0.0923511	0.486094	0.000608518	0.311001	0.00846999
GH1	2.23392e-05	0.412271	0.00025533	0.0889017	0.182434	0.309653	1.93834e-06	0.382148	4.25998e-05	0.0338631	0.19551	0.119543
CXCL8	2.14209e-07	0.493205	5.91298e-06	0.670089	0.0460488	0.850214	0.000973105	0.270188	0.00659951	0.000292341	0.327666	0.00497207
S100A12	0.0217901	0.230372	0.0641427	0.450017	0.0815563	0.705687	0.00203078	0.253371	0.0117312	0.00357851	0.266152	0.0290555
AREG	0.00185916	0.308987	0.00852649	0.00240505	0.319576	0.0322613	0.125099	0.127509	0.295632	0.000103106	0.349835	0.00245023
WFDC2	0.00642246	0.272178	0.0243421	0.00123145	0.339062	0.0193781	0.377153	0.073624	0.587642	0.00163943	0.286808	0.0178808
NECTIN2	1.62808e-07	0.497392	5.03154e-06	0.0163342	0.255377	0.120789	0.569483	0.0474567	0.739821	0.00145216	0.289884	0.016201
TNFRSF1A	1.1059e-06	0.466923	2.37932e-05	0.00602528	0.290577	0.0622829	0.605594	0.0430859	0.769379	0.00214237	0.279902	0.0211559
CSTB	0.00243667	0.301349	0.0109017	0.00159863	0.331615	0.0240127	0.77566	0.0237862	0.87776	0.0402752	0.189108	0.130272
CHI3L1	0.000645284	0.337089	0.00373143	0.00122174	0.339285	0.0193781	0.03177	0.177821	0.108867	0.32372	0.0916304	0.475016
CSF1	5.23805e-10	0.574052	3.4833e-08	0.0430619	0.216198	0.208723	0.185274	0.110245	0.384404	0.0167842	0.219787	0.078875
VWA1	6.6247e-09	0.542494	3.23065e-07	0.0839805	0.185261	0.301883	0.0589924	0.156653	0.174001	0.0032328	0.268931	0.0274694
FKBP5	8.64759e-09	0.538981	3.95357e-07	0.00679435	0.286561	0.0681046	0.0235858	0.187303	0.0871572	0.000199084	0.336033	0.00368306
VEGFA	4.92883e-08	0.514999	1.94889e-06	0.565536	0.0620853	0.785579	0.106579	0.134105	0.26833	3.81791e-05	0.369538	0.00112725
MAD1L1	4.13583e-07	0.482933	1.04323e-05	0.025915	0.237439	0.157677	0.0850423	0.143022	0.227428	0.000726663	0.306819	0.00952483
TNC	4.73061e-07	0.480793	1.15348e-05	0.0713306	0.193186	0.278705	0.0310061	0.178611	0.107002	0.0012733	0.293178	0.0147109
CKAP4	4.91709e-07	0.480175	1.1793e-05	0.00281108	0.314847	0.0361751	0.365586	0.0754211	0.580406	0.02994	0.199952	0.111768
IL10	5.86797e-07	0.477331	1.36267e-05	0.668129	0.0463394	0.848402	0.849054	0.015887	0.917976	1.5753e-05	0.386079	0.000561536
SPP1	8.1769e-07	0.471925	1.81255e-05	0.0416036	0.217695	0.204471	0.0792314	0.145734	0.21624	0.0140034	0.225678	0.0707584
POLR2F	1.55482e-06	0.461183	3.2038e-05	0.0120325	0.266641	0.0969455	0.857497	0.0149886	0.924213	0.0036481	0.265622	0.0295385
DPY30	1.71171e-06	0.459544	3.45661e-05	0.0173928	0.253005	0.12509	0.0705078	0.150125	0.198358	0.00193012	0.282616	0.0199857
IL2RA	1.79145e-06	0.458765	3.54175e-05	0.351266	0.100552	0.633552	0.0318322	0.177757	0.108924	0.0404244	0.18897	0.130272
TXNDC15	1.90774e-06	0.457685	3.6247e-05	0.57024	0.0613367	0.787349	0.620957	0.0412619	0.779158	0.018887	0.215871	0.0848298
MCFD2	2.1248e-06	0.455827	3.88574e-05	0.0157358	0.256778	0.116964	0.150834	0.119494	0.335061	0.00282337	0.272591	0.0250082
LIF	2.16699e-06	0.455487	3.91395e-05	0.400692	0.0906973	0.664363	0.212127	0.103877	0.420656	0.0186715	0.216255	0.084484
PLAUR	2.97402e-06	0.449958	5.00113e-05	0.0146373	0.259472	0.110929	0.616262	0.0418172	0.775434	0.0244476	0.207085	0.0997206
LBP	3.18319e-06	0.448758	5.23957e-05	0.360585	0.0986319	0.64227	0.00114512	0.266559	0.00748811	0.00772451	0.244107	0.0497154
SPON2	3.22325e-06	0.448537	5.23957e-05	0.0269134	0.235915	0.162042	0.323366	0.0823001	0.544469	0.014429	0.224713	0.0716557
TGFA	3.49873e-06	0.447082	5.62488e-05	0.0888533	0.182461	0.309653	0.193958	0.108117	0.393002	0.000126616	0.345594	0.00272615
CCL3	6.23162e-06	0.436649	9.20895e-05	0.354753	0.0998296	0.637451	0.276719	0.0906139	0.496836	0.0157619	0.221846	0.075785
COX5B	8.34948e-06	0.431227	0.000118595	0.00874856	0.277922	0.0783567	0.19304	0.108338	0.392779	0.00398956	0.263146	0.0316888
TNFRSF10B	8.87902e-06	0.430076	0.000121193	0.0116649	0.267759	0.0958447	0.700135	0.0321423	0.837012	0.015213	0.223001	0.0739165
TIMP1	8.94657e-06	0.429933	0.000121193	0.193684	0.139872	0.477831	0.680527	0.0343615	0.821297	0.00144918	0.289935	0.016201
TXNDC5	9.96736e-06	0.427899	0.000132566	0.207453	0.135698	0.489785	0.340505	0.0794429	0.559155	0.0119421	0.230743	0.0641668
ZBTB17	1.09641e-05	0.426093	0.000140706	0.0221902	0.243603	0.145446	0.68302	0.0340781	0.823625	0.137191	0.137641	0.272609
PLA2G2A	1.19568e-05	0.424442	0.000152112	0.103057	0.17494	0.335458	0.00335994	0.241194	0.0179874	0.0112182	0.232705	0.0617531
CD14	1.22505e-05	0.423978	0.000154505	0.27233	0.118297	0.560317	0.245201	0.0967808	0.457385	0.0875209	0.157984	0.204332
MPHOSPH8	1.26445e-05	0.423372	0.00015677	0.120278	0.166838	0.368239	0.54108	0.050987	0.71947	0.00758047	0.244669	0.0489372
GPKOW	1.4644e-05	0.420546	0.000178534	0.0293853	0.23234	0.170455	0.816752	0.0193421	0.902596	0.00694877	0.247251	0.0458493
GFRA1	1.51339e-05	0.419909	0.000182982	0.00682463	0.286411	0.0681046	0.331865	0.0808715	0.552415	0.0586647	0.174572	0.164565
IL4R	1.5338e-05	0.419649	0.00018393	0.111316	0.170933	0.350858	0.173392	0.11328	0.367797	0.103388	0.150676	0.226539
PREB	1.55993e-05	0.419321	0.000185543	0.271253	0.118561	0.55878	0.903394	0.0101318	0.947478	0.108228	0.148623	0.232363
EPO	2.09677e-05	0.413526	0.000245406	0.0470623	0.212296	0.218563	0.301187	0.0861467	0.522683	0.42523	0.0740926	0.575438
TNFRSF10A	2.13246e-05	0.413192	0.000247602	0.00845111	0.27912	0.0764044	0.142326	0.12202	0.324761	0.0352448	0.194049	0.121058
MZB1	2.62212e-05	0.409074	0.000297377	0.32543	0.106047	0.614182	0.478111	0.0591628	0.671269	0.373759	0.0826204	0.525239
TNFRSF1B	3.17953e-05	0.405184	0.000352398	0.0757364	0.190307	0.28514	0.944042	0.0058593	0.971555	0.0218107	0.21101	0.0934791
LRIG1	3.60056e-05	0.402648	0.000388302	0.000477214	0.364683	0.00936249	0.0851571	0.14297	0.227527	0.0262263	0.204637	0.102654
C4BPB	3.62347e-05	0.402518	0.000388302	0.00762124	0.282669	0.0723175	0.411753	0.0684396	0.615886	0.00345227	0.267138	0.0285863
MDK	3.63618e-05	0.402447	0.000388302	0.0552556	0.205093	0.241085	0.020033	0.192331	0.0768458	0.0473572	0.182962	0.142706
PAG1	3.78404e-05	0.401629	0.000401163	0.204403	0.136605	0.487891	0.63921	0.0391199	0.792363	0.0209365	0.212402	0.0912035
METAP1D	4.36841e-05	0.398665	0.00045007	0.00945162	0.275227	0.0828525	0.138162	0.123298	0.318742	0.00235295	0.27744	0.0226239
NUDC	4.43005e-05	0.398375	0.000450081	0.0423533	0.21692	0.207028	0.38023	0.0731516	0.589921	0.103862	0.150472	0.226727
PRDX3	4.62098e-05	0.397498	0.000463048	0.0289912	0.232892	0.16994	0.196141	0.107592	0.39594	0.00249243	0.275917	0.0233505
CLEC1B	4.75485e-05	0.396903	0.000473221	0.586541	0.0587653	0.799502	0.0455805	0.165738	0.143106	0.0217385	0.211124	0.0934434
CCL7	5.50604e-05	0.393829	0.000523074	0.17235	0.146786	0.446938	0.243839	0.0970593	0.456885	0.0726925	0.16584	0.183139
CCL23	7.10357e-05	0.388418	0.000641514	0.160707	0.150828	0.430744	0.340834	0.0793889	0.559381	0.000344249	0.324032	0.00562146
RRM2	7.60921e-05	0.386941	0.000674683	0.0315937	0.229354	0.177614	0.116727	0.130389	0.282211	0.0859596	0.158758	0.202545
GP6	7.74628e-05	0.386557	0.0006827	0.777398	0.0305672	0.90506	0.659774	0.0367368	0.806452	0.0195189	0.214768	0.0867078
TXLNA	9.51234e-05	0.382098	0.000815446	0.0362881	0.223551	0.192734	0.364715	0.0755578	0.580328	0.0478684	0.182549	0.143654
TNFRSF6B	9.78769e-05	0.381473	0.000830987	0.312739	0.108848	0.604705	0.47152	0.0600506	0.667112	0.471209	0.066967	0.619867
ATP5IF1	9.82643e-05	0.381386	0.000830987	0.599131	0.0568014	0.805968	0.919861	0.00839853	0.959471	0.0124297	0.22948	0.0658518
TMSB10	0.000114727	0.377973	0.000942956	0.145529	0.156437	0.407086	0.44505	0.0636869	0.645598	0.0190358	0.215609	0.084949
CLPP	0.000135616	0.374244	0.00107829	0.0188546	0.249926	0.131345	0.0439135	0.167018	0.139369	0.0157637	0.221843	0.075785
SPINK1	0.000151403	0.371764	0.00117197	0.00175523	0.328902	0.025827	0.154046	0.118568	0.339574	0.000389447	0.32126	0.0061865
BRK1	0.00016516	0.369791	0.00126508	0.014026	0.261049	0.109327	0.00895237	0.215628	0.0409511	0.00405821	0.262671	0.0321468
CXCL13	0.000248863	0.360317	0.00171739	0.0828773	0.185912	0.301725	0.979178	0.00217868	0.990359	0.049989	0.180872	0.148948
SIGLEC10	0.000312921	0.354893	0.00205772	0.197882	0.138578	0.482703	0.772882	0.0240889	0.876034	0.0978819	0.153104	0.219577
RCOR1	0.000381351	0.350131	0.00238426	0.0972373	0.177916	0.324907	0.754836	0.0260632	0.865989	0.155539	0.131575	0.296182
HPCAL1	0.000399757	0.348985	0.00247816	0.0547869	0.20548	0.239402	0.0969528	0.137895	0.250347	0.0247976	0.206592	0.100254
HEXIM1	0.000462734	0.3454	0.00283255	0.00244121	0.319127	0.0325947	0.235811	0.0987232	0.448683	0.00557934	0.253654	0.0395885
IL15	0.000608187	0.338586	0.00357341	0.316738	0.107958	0.607818	0.239536	0.0979463	0.452595	0.00015914	0.340803	0.00318608
PTPN1	0.000658825	0.336563	0.003766	0.250314	0.123845	0.540932	0.0347652	0.174869	0.116669	0.00337571	0.267751	0.0281117
TNFRSF14	0.000658986	0.336556	0.003766	0.155748	0.152615	0.423752	0.929952	0.00733811	0.964052	0.0384069	0.190879	0.126139
TDRKH	0.000713611	0.334528	0.00403094	0.113217	0.170043	0.354526	0.347641	0.0782802	0.562966	0.000870883	0.302487	0.010995
SCAMP3	0.000803346	0.331485	0.00438543	0.227703	0.129904	0.512642	0.0240332	0.186717	0.0882525	0.00212567	0.280107	0.0210621
HTRA2	0.000816919	0.331052	0.00444295	0.543534	0.0656257	0.76954	0.65074	0.0377799	0.801903	0.0787043	0.162513	0.192936
CCL14	0.000900712	0.328517	0.00482689	0.221812	0.13155	0.508424	0.606337	0.0429971	0.769379	0.010015	0.236226	0.0577392
PTK7	0.000934786	0.327547	0.00497306	0.00752734	0.283091	0.0721225	0.65314	0.0375023	0.803167	0.442053	0.0714374	0.590873
MMP1	0.000999064	0.325802	0.00525766	0.0195491	0.248535	0.134483	0.0116923	0.208162	0.0501859	0.0139811	0.225729	0.0707584
KRT19	0.00110608	0.323112	0.00561873	0.0315802	0.229372	0.177614	0.227585	0.10047	0.439984	0.00706827	0.246747	0.0463241
NPPB	0.00111072	0.323	0.0056228	0.143089	0.15738	0.402392	0.304064	0.0856376	0.525489	0.072113	0.166172	0.182657
TFPI2	0.00131385	0.318504	0.00647191	0.464478	0.0789848	0.71634	0.089385	0.14109	0.236018	0.017313	0.218764	0.0807986
ASGR1	0.00142546	0.316297	0.00694262	0.385886	0.0935682	0.654645	0.455614	0.0622216	0.654106	0.0105062	0.234746	0.0595145
TARBP2	0.0014513	0.315808	0.00698437	0.410892	0.0887559	0.672352	0.163961	0.1158	0.35448	0.0261226	0.204776	0.102629
PLIN3	0.00243456	0.301374	0.0109017	0.367651	0.0971965	0.644324	0.384816	0.0724518	0.595457	0.00253806	0.275436	0.0235162
SCARF1	0.00269297	0.298473	0.0117606	0.523211	0.068959	0.753685	0.614684	0.0420042	0.774449	0.0768624	0.16351	0.190075
PAEP	0.00277475	0.297608	0.0120817	0.000181891	0.388742	0.00464224	0.54151	0.0509329	0.71947	0.0547874	0.177286	0.158387
STX4	0.00287705	0.296556	0.0123798	0.316914	0.107919	0.607818	0.0308662	0.178758	0.106772	0.0110957	0.233048	0.0615424
CD40	0.00288869	0.296439	0.0123934	0.625531	0.0527417	0.821882	0.234948	0.0989045	0.447997	0.0320673	0.197486	0.115434
STX6	0.0029757	0.295574	0.0126923	0.0918078	0.180822	0.313713	0.0600516	0.156011	0.176236	0.0118813	0.230904	0.0639577
BAX	0.00355635	0.290322	0.0148232	0.0294928	0.23219	0.170455	0.0516709	0.161371	0.157491	0.000247415	0.331329	0.00438299
ATOX1	0.0040966	0.286086	0.0166945	0.0219623	0.244008	0.144805	0.107926	0.133596	0.269862	0.017919	0.217624	0.0820959
TNFSF13	0.00499198	0.280057	0.0198458	0.0564523	0.204115	0.243725	0.348069	0.0782109	0.563347	0.0343723	0.194966	0.120324
VWF	0.00505237	0.279685	0.0200014	0.153274	0.153523	0.420458	0.400866	0.0700417	0.608949	0.0566175	0.175986	0.160406
HSPA1A	0.00511445	0.279308	0.0201683	0.0103623	0.271986	0.0876391	0.50966	0.0550011	0.696138	0.00263607	0.274427	0.0241544
ENAH	0.00528892	0.278269	0.020748	0.13786	0.15944	0.395218	0.526066	0.0528899	0.708287	0.246994	0.107408	0.3951
CGREF1	0.00566598	0.276124	0.0221049	0.104705	0.174121	0.337018	0.600371	0.0437105	0.766845	0.831483	0.0197987	0.898494
EIF4G1	0.00586414	0.275047	0.0226705	0.0120678	0.266535	0.0969455	0.365956	0.0753631	0.580406	0.0387404	0.190558	0.127091
SERPINA11	0.00607404	0.273941	0.0233237	0.366257	0.0974783	0.643913	0.192475	0.108475	0.392779	0.0858725	0.158802	0.202545
CST7	0.00657175	0.271448	0.0247053	0.198083	0.138516	0.482703	0.655159	0.0372689	0.804296	0.00630008	0.250129	0.0433139
PRL	0.00658582	0.27138	0.0247053	0.0221554	0.243665	0.145446	0.00395882	0.237096	0.0207006	0.00195202	0.282323	0.0200202
ABL1	0.00677645	0.270471	0.0253554	0.030803	0.230402	0.175913	0.298761	0.0865787	0.519499	0.0652706	0.17027	0.174338
F11R	0.00708589	0.269042	0.0263113	0.846662	0.020911	0.936075	0.166034	0.115237	0.358398	0.00575564	0.252756	0.0405391
SERPINB6	0.00731463	0.268021	0.0270235	0.207572	0.135663	0.489785	0.831751	0.0177341	0.908282	0.122718	0.142878	0.252077
TNFRSF8	0.00738504	0.267713	0.0272149	0.984148	0.00214877	0.993796	0.459359	0.0617068	0.657545	0.316738	0.0929562	0.469963
SAMD9L	0.00742481	0.267539	0.0272927	0.489049	0.0747137	0.728295	0.160887	0.116644	0.349906	0.0378848	0.191387	0.125268
TBL1X	0.00749343	0.267243	0.0274072	0.13355	0.161184	0.390627	0.186842	0.109856	0.385579	0.197649	0.119442	0.343069
ICA1	0.00862114	0.262679	0.0304655	0.0199772	0.247698	0.136204	0.704884	0.0316082	0.840284	0.157762	0.130877	0.298858
MAVS	0.00919922	0.26054	0.0321973	0.252766	0.123211	0.544014	0.0387661	0.171244	0.126607	0.00429402	0.261093	0.0331172
LAT2	0.0093549	0.259984	0.0325862	0.464776	0.0789323	0.716416	0.657147	0.0370395	0.804985	0.317177	0.0928723	0.470374
EGF	0.0094888	0.259512	0.032896	0.722037	0.0384576	0.879744	0.150863	0.119485	0.335061	0.125124	0.141976	0.254869
PPP1R9B	0.0105109	0.256093	0.0356787	0.324784	0.106188	0.614182	0.181368	0.111226	0.378671	0.00989132	0.236609	0.0573269
CCL4	0.0108701	0.254961	0.0365586	0.936264	0.00864791	0.97778	0.960598	0.00412407	0.981758	0.0123226	0.229753	0.0656082
TYMP	0.0111255	0.254175	0.0373317	0.937171	0.00852462	0.97778	0.232846	0.0993478	0.446584	0.00465448	0.258825	0.0349744
DAB2	0.0114922	0.253074	0.0382317	0.154664	0.153012	0.422725	0.241111	0.0976204	0.454056	0.0303651	0.199447	0.112541
EBAG9	0.0121277	0.251238	0.0400515	0.0247019	0.239359	0.153806	0.144877	0.12125	0.327373	0.0133503	0.227208	0.0689449
CD300E	0.0124893	0.25023	0.0408766	0.245258	0.125166	0.534596	0.17756	0.112198	0.374194	0.362712	0.0845415	0.515665
DBI	0.0139273	0.246457	0.0446834	0.0963988	0.178356	0.322897	0.313645	0.0839641	0.534569	0.00258312	0.274968	0.0238185
PDLIM7	0.0146519	0.244683	0.0464984	0.498287	0.0731373	0.734318	0.343228	0.0789974	0.559852	0.030927	0.19879	0.113853
ERBIN	0.0150651	0.243705	0.0476032	0.167255	0.148529	0.43978	0.192316	0.108514	0.392779	0.0232337	0.208845	0.0966031
LGMN	0.0152513	0.243272	0.0479841	0.77384	0.0310691	0.903544	0.141438	0.12229	0.323493	0.66889	0.0397782	0.784892
CLEC5A	0.0155233	0.242648	0.0487353	0.0314529	0.229539	0.177614	0.237683	0.0983318	0.450602	0.00226267	0.27847	0.0221939
EGLN1	0.0158106	0.241998	0.0494423	0.143293	0.1573	0.402392	0.681307	0.0342728	0.821898	0.000987773	0.299435	0.0121825
XRCC4	0.0167825	0.239875	0.0521292	0.0398103	0.219597	0.202384	0.341164	0.0793348	0.559608	0.000831104	0.303612	0.0106971
SRPK2	0.0174665	0.238443	0.053797	0.0851408	0.184583	0.302773	0.365513	0.0754325	0.580406	0.0142633	0.225086	0.0713896
CD69	0.0189824	0.235435	0.0576167	0.945854	0.00734456	0.978139	0.0757545	0.147435	0.209291	0.0142261	0.22517	0.0713258
SMOC1	0.0201956	0.233173	0.0604216	0.40129	0.0905829	0.664363	0.980413	0.0020495	0.99058	0.752868	0.0292908	0.846723
MMP8	0.0203288	0.232932	0.0605724	0.223753	0.131004	0.509459	0.801267	0.0210098	0.893127	3.64868e-05	0.370408	0.00111095
RETN	0.0207086	0.232252	0.0614538	0.141892	0.157846	0.400915	0.836187	0.0172598	0.910307	0.445594	0.0708858	0.594194
MED18	0.0225497	0.229099	0.0659805	0.190445	0.140885	0.474304	0.197248	0.107328	0.3979	0.118984	0.144306	0.247186
AHCY	0.022806	0.228677	0.066597	7.71148e-06	0.456754	0.00041185	0.0884039	0.14152	0.234274	0.00185464	0.283646	0.0194305
DNMBP	0.0235451	0.227484	0.0684822	0.310033	0.109455	0.603153	0.0133172	0.204436	0.0550544	0.022456	0.210014	0.0951298
NUDT5	0.0245059	0.225981	0.070854	0.219046	0.132334	0.503772	0.930411	0.0072899	0.964052	0.00209613	0.280472	0.0209112
FKBP4	0.0252221	0.224892	0.0723528	0.00055342	0.360817	0.0105215	0.463728	0.0611091	0.660765	0.0124441	0.229443	0.0658518
CNST	0.0263255	0.223266	0.0750982	0.348727	0.10108	0.632246	0.375002	0.0739556	0.586166	0.0320155	0.197545	0.115434
TACC3	0.0296104	0.218745	0.08283	0.535275	0.0669728	0.763167	0.475064	0.0595725	0.669533	0.172896	0.126312	0.314825
DOK2	0.0298896	0.218381	0.0834512	0.507931	0.0715081	0.741332	0.41772	0.0675719	0.621056	0.0553427	0.176888	0.158387
BACH1	0.0308884	0.217101	0.085749	0.374934	0.0957346	0.647255	0.0696609	0.150574	0.196923	0.0349853	0.19432	0.120734
SLC27A4	0.0319561	0.215771	0.0882109	0.616025	0.0541947	0.814664	0.826259	0.0183221	0.906541	0.0182385	0.217037	0.0829112
CRACR2A	0.032356	0.215282	0.0891464	0.839366	0.0219192	0.934208	0.00166787	0.257979	0.0100313	0.0237184	0.208133	0.0979221
SERPINB1	0.0334551	0.213965	0.0914294	0.451098	0.0813625	0.705687	0.314382	0.0838369	0.534577	0.013779	0.226196	0.0700452
STX8	0.0353734	0.211751	0.0956212	0.384585	0.0938236	0.654362	0.0361595	0.173568	0.119971	0.017641	0.218143	0.0814605
CPXM1	0.0354228	0.211695	0.0956212	0.85685	0.0195062	0.93966	0.739607	0.0277406	0.857205	0.267909	0.102813	0.416985
TRIM5	0.0354502	0.211664	0.0956212	0.0529862	0.206995	0.235096	0.19304	0.108338	0.392779	0.169848	0.127207	0.311481
IQGAP2	0.0356154	0.211479	0.0957819	0.917694	0.0111753	0.970884	0.1778	0.112137	0.374431	0.265388	0.103354	0.414385
CXCL16	0.035931	0.211126	0.0962766	0.823988	0.0240503	0.926821	0.425525	0.0664479	0.629364	0.00592802	0.251901	0.0412562
GNE	0.03662	0.210366	0.0977647	0.209994	0.13495	0.492777	0.114164	0.131303	0.278135	0.0288883	0.201226	0.10994
CTSB	0.0366991	0.210279	0.0977702	0.990839	0.00124171	0.995989	0.478133	0.0591599	0.671269	0.0339648	0.195401	0.119602
HSPB1	0.0399471	0.206853	0.105074	0.0586947	0.202328	0.247815	0.244196	0.0969861	0.45696	0.041419	0.188057	0.131739
FUT3_FUT5	0.041924	0.20488	0.108398	0.333778	0.104242	0.619046	0.175129	0.112827	0.370944	0.37484	0.0824341	0.526506
GYS1	0.042394	0.204422	0.109002	0.190445	0.140885	0.474304	0.376564	0.0737146	0.587097	0.0174147	0.21857	0.0807986
DFFA	0.0495207	0.197954	0.123212	0.0144299	0.260001	0.110929	0.74261	0.027409	0.858304	0.00688458	0.247525	0.0456697
FXN	0.0504342	0.197181	0.124978	0.00839069	0.279367	0.0763367	0.0513406	0.161597	0.156648	0.00276628	0.273139	0.0245771
PPP1R12A	0.0511391	0.196593	0.126166	0.65012	0.0490253	0.836509	0.125884	0.127247	0.29698	0.020121	0.213746	0.0888423
ILKAP	0.0524413	0.195524	0.128728	0.137574	0.159555	0.395218	0.881882	0.0124031	0.933558	0.0378366	0.191434	0.125251
ITGB1BP2	0.0530684	0.195017	0.129831	0.129848	0.162716	0.386313	0.719251	0.0300002	0.847658	0.0273705	0.203137	0.105546
VSTM1	0.0558629	0.192815	0.135535	0.507774	0.0715346	0.741332	0.992979	0.000734582	0.996046	0.0558149	0.176552	0.159168
GSTP1	0.0580708	0.191139	0.139503	0.970899	0.00394528	0.990437	0.193726	0.108172	0.392964	0.101523	0.151487	0.224134
AIF1	0.0604428	0.189395	0.14449	0.955711	0.00600598	0.985086	0.783904	0.0228897	0.882307	0.85021	0.0175708	0.909749
SCRN1	0.063826	0.187001	0.151587	0.938596	0.00833087	0.97778	0.906084	0.00984841	0.948751	0.0429227	0.186712	0.134906
MMP13	0.0640856	0.186822	0.151957	0.287707	0.114598	0.581463	0.0378753	0.172023	0.124533	0.047156	0.183126	0.142541
CHGB	0.0666366	0.18509	0.157495	0.0450118	0.21426	0.214506	0.572108	0.0471347	0.741584	0.0421944	0.187359	0.132903
ENO1	0.0671099	0.184775	0.158358	0.0223099	0.243392	0.145569	0.377867	0.0735141	0.588442	0.00701263	0.246981	0.0460684
SSB	0.0683478	0.183959	0.15991	0.406967	0.0894997	0.669989	0.579432	0.0462401	0.748091	0.00058732	0.31183	0.00821405
AGR2	0.0727372	0.181157	0.168111	0.514765	0.0703633	0.746396	0.562672	0.0482954	0.735364	0.0337579	0.195624	0.119316
TJAP1	0.075767	0.179302	0.174631	0.82215	0.0243057	0.925841	0.122479	0.128394	0.29121	0.101949	0.1513	0.224735
LGALS8	0.0757969	0.179284	0.174631	0.0483446	0.211104	0.223081	0.14323	0.121746	0.324796	0.00506245	0.25644	0.0372734
YES1	0.0771007	0.178504	0.176921	0.23552	0.127764	0.522378	0.352606	0.0774801	0.567548	0.301256	0.0959656	0.454952
CA13	0.0779257	0.178016	0.177352	0.614705	0.0543973	0.814336	0.642255	0.0387651	0.79446	0.0652648	0.170274	0.174338
ST3GAL1	0.0801675	0.176711	0.181275	0.141294	0.15808	0.400579	0.988704	0.00118189	0.992891	0.0581505	0.174923	0.163594
FOXO3	0.0823828	0.175449	0.184009	0.393339	0.0921152	0.659754	0.644408	0.0385145	0.796114	0.0421903	0.187362	0.132903
IRAK1	0.0836863	0.174719	0.185786	0.136815	0.159859	0.395218	0.322763	0.0824023	0.544081	0.0567427	0.175898	0.160553
SRC	0.0920479	0.170242	0.200907	0.834403	0.0226061	0.931844	0.351538	0.0776517	0.566549	0.212722	0.11556	0.359635
MITD1	0.0976823	0.167403	0.209852	0.663032	0.0470967	0.843947	0.415977	0.0678245	0.619095	0.147239	0.134248	0.284583
MESD	0.100015	0.166266	0.213734	0.377144	0.0952943	0.649281	0.336348	0.0801273	0.556116	0.0145027	0.224549	0.0716557
PRKAB1	0.100105	0.166222	0.213734	0.429377	0.0853078	0.690181	0.881626	0.0124301	0.933558	0.189102	0.121739	0.334458
ANGPTL4	0.101263	0.165665	0.215645	0.5763	0.0603768	0.791453	0.903321	0.0101395	0.947478	0.0531487	0.17848	0.1552
STK24	0.102458	0.165096	0.21724	0.785093	0.0294839	0.908	0.284279	0.0892064	0.50366	0.0716893	0.166417	0.182142
AXIN1	0.119628	0.15744	0.245808	0.197623	0.138657	0.482594	0.215964	0.103015	0.42594	0.144482	0.135161	0.281091
ATXN10	0.1329	0.152085	0.265981	0.00854418	0.278741	0.0770044	0.0177849	0.195927	0.0697787	0.0177638	0.217913	0.0817286
DECR1	0.135747	0.15099	0.269834	0.46798	0.0783687	0.71686	0.347581	0.0782898	0.562966	0.086026	0.158725	0.202545
GP2	0.139017	0.149754	0.275006	0.227639	0.129921	0.512642	0.85601	0.0151467	0.923517	0.321497	0.0920504	0.473072
IL1B	0.152296	0.144948	0.293556	0.81373	0.025477	0.922905	0.0247162	0.18584	0.0904199	0.0176176	0.218187	0.0814605
SNAP23	0.153182	0.144639	0.294101	0.489149	0.0746964	0.728295	0.558246	0.0488429	0.732714	0.0621765	0.172238	0.169852
GBP2	0.156889	0.143359	0.299256	0.223282	0.131136	0.509451	0.925932	0.00776035	0.962216	0.346363	0.0874523	0.497747
AKR1B1	0.157198	0.143253	0.299454	0.372555	0.0962102	0.646319	0.0889838	0.141265	0.235171	0.0397982	0.189554	0.1294
PDCD5	0.159968	0.142313	0.304322	0.124503	0.164988	0.376687	0.945678	0.00568771	0.972631	0.0106156	0.234425	0.0600181
SERPINB9	0.162532	0.141454	0.307613	0.815248	0.0252656	0.92307	0.318217	0.0831774	0.538668	0.51592	0.0603931	0.65708
MANF	0.175166	0.13736	0.322755	0.411477	0.0886454	0.672352	0.485809	0.0581341	0.676845	0.022375	0.210137	0.0951298
CD63	0.17607	0.137075	0.323553	0.326158	0.105888	0.614182	0.248996	0.0960104	0.462692	0.132075	0.139442	0.266245
PRTFDC1	0.176365	0.136982	0.323553	0.454546	0.0807461	0.70631	0.287278	0.088655	0.506768	0.254259	0.105783	0.402817
RHOC	0.192321	0.132134	0.343585	0.203932	0.136746	0.487891	0.20103	0.106433	0.404413	0.105253	0.149876	0.22891
FYB1	0.193182	0.131881	0.344664	0.488843	0.0747489	0.728295	0.461906	0.0613579	0.659898	0.084949	0.159266	0.202039
IL19	0.196831	0.130817	0.350747	0.128464	0.163297	0.384725	0.309903	0.0846138	0.531287	0.111716	0.147188	0.23743
IKBKG	0.199362	0.130087	0.353642	0.602596	0.0562642	0.806818	0.0838513	0.143565	0.225067	0.0713425	0.166618	0.182126
PMVK	0.199664	0.13	0.353642	0.288717	0.11436	0.582355	0.118152	0.129888	0.284479	0.0850359	0.159222	0.202081
NUB1	0.202875	0.129085	0.357828	0.200658	0.137732	0.4863	0.434571	0.0651599	0.635126	0.0711539	0.166727	0.182122
CALB1	0.206673	0.128016	0.362981	0.0533694	0.206669	0.235708	0.660762	0.0366231	0.806452	0.257922	0.104976	0.40598
PDP1	0.218334	0.124818	0.379401	0.434317	0.0844007	0.69433	0.386951	0.0721278	0.597495	0.0672735	0.169036	0.177155
GOPC	0.240708	0.119005	0.407588	0.167561	0.148423	0.43978	0.480406	0.0588552	0.67349	0.244048	0.108076	0.392599
TBC1D5	0.243625	0.118275	0.4111	0.526062	0.0684875	0.756012	0.00483175	0.232026	0.0243192	0.0229443	0.209276	0.0960836
BCR	0.246968	0.117446	0.414826	0.253142	0.123114	0.544417	0.160769	0.116677	0.349906	0.111358	0.147334	0.237071
SF3B4	0.25881	0.114571	0.428325	0.309838	0.109499	0.603153	0.124186	0.127815	0.294162	0.0303497	0.199466	0.112541
CDC27	0.261563	0.113915	0.432392	0.00265164	0.316626	0.0346033	0.0262094	0.183992	0.0943474	0.00330423	0.268335	0.0276741
HNRNPK	0.265835	0.112907	0.436928	0.426324	0.0858714	0.686498	0.574723	0.0468146	0.744314	0.0622892	0.172165	0.170001
C2CD2L	0.271916	0.111491	0.442681	0.391479	0.0924762	0.659308	0.276206	0.0907102	0.49622	0.0133761	0.227146	0.0689563
RNF41	0.273309	0.11117	0.443786	0.094311	0.179466	0.319296	0.426279	0.0663399	0.629364	0.148152	0.133949	0.285463
MAGED1	0.279232	0.109815	0.451898	0.486587	0.0751364	0.727483	0.954654	0.00474682	0.977734	0.0504607	0.180507	0.150048
ZBTB16	0.285186	0.108473	0.457886	0.12732	0.163782	0.382863	0.634556	0.0396636	0.789952	0.000538201	0.31386	0.00771157
GBP4	0.29027	0.107341	0.464116	0.77465	0.0309547	0.90361	0.0888033	0.141344	0.234907	0.198645	0.119179	0.344389
MIF	0.290943	0.107193	0.464465	0.135605	0.160347	0.394601	0.518047	0.0539176	0.702343	0.00368844	0.265319	0.029619
PLA2G4A	0.297458	0.105764	0.473023	0.289763	0.114114	0.58293	0.307706	0.0849975	0.529073	0.0411434	0.188308	0.131005
SEMA4D	0.297968	0.105653	0.47332	0.241692	0.126109	0.529301	0.284875	0.0890966	0.504354	0.576567	0.0519235	0.710762
RWDD1	0.30783	0.103532	0.484252	0.395659	0.091666	0.660731	0.612783	0.0422298	0.77272	0.018592	0.216397	0.0842547
KIFBP	0.310744	0.102913	0.487788	0.243122	0.125729	0.530782	0.379914	0.0732	0.589921	0.0254729	0.205656	0.101302
SNAP29	0.318226	0.101342	0.493505	0.450803	0.0814154	0.705687	0.251304	0.0955458	0.465797	0.0361502	0.193118	0.122583
OSMR	0.322909	0.100371	0.498329	0.686268	0.0436622	0.857616	0.999281	7.51935e-05	0.9993	0.383004	0.0810391	0.533359
FST	0.330121	0.0988933	0.504668	0.104338	0.174302	0.336993	0.780249	0.0232868	0.879887	0.035661	0.193619	0.121602
WWP2	0.336172	0.0976691	0.510187	0.197202	0.138786	0.481975	0.685108	0.033841	0.825802	0.147693	0.134099	0.284768
FMR1	0.341487	0.0966054	0.517179	0.184466	0.142788	0.465849	0.194918	0.107885	0.394561	0.0102781	0.235425	0.0585634
CRKL	0.343573	0.0961908	0.517659	0.292433	0.113488	0.586283	0.416297	0.0677782	0.619255	0.0324258	0.197084	0.116295
CDC37	0.351324	0.0946635	0.525013	0.0890729	0.182338	0.30967	0.451832	0.0627441	0.651556	0.0189366	0.215784	0.0848298
DNAJA2	0.353099	0.0943169	0.525596	0.130755	0.162338	0.387582	0.742243	0.0274494	0.858219	0.173485	0.12614	0.314967
TBCB	0.361982	0.0925977	0.537099	0.13764	0.159528	0.395218	0.399866	0.0701902	0.608042	0.0610982	0.172943	0.168527
GRAP2	0.373293	0.0904458	0.546795	0.339104	0.103106	0.622914	0.736678	0.0280645	0.855207	0.122389	0.143003	0.251618
WASF1	0.390426	0.0872606	0.558897	0.167586	0.148415	0.43978	0.175991	0.112603	0.372231	0.0946983	0.154558	0.214576
CALCOCO1	0.392114	0.0869514	0.560457	0.516877	0.0700111	0.749082	0.00516095	0.230325	0.025612	0.137486	0.137539	0.272937
CC2D1A	0.397204	0.0860238	0.564732	0.288194	0.114483	0.582039	0.521139	0.0535204	0.705227	0.0291234	0.200938	0.110269
LACTB2	0.41904	0.0821215	0.585536	0.0292151	0.232578	0.170455	0.931696	0.00715494	0.964358	0.0187759	0.216069	0.0848252
TST	0.421964	0.0816082	0.588496	0.35339	0.100111	0.635793	0.0489283	0.163282	0.151341	0.196285	0.119804	0.342532
PTPN6	0.423801	0.0812866	0.58906	0.355009	0.0997768	0.637513	0.673154	0.0352021	0.816103	0.120606	0.143682	0.249668
TBCC	0.427241	0.0806867	0.591445	0.0743801	0.191179	0.282998	0.604803	0.0431803	0.769379	0.0450065	0.184912	0.138187
MAP4K5	0.428664	0.0804393	0.592688	0.226307	0.130291	0.512642	0.835501	0.017333	0.909899	0.192548	0.120804	0.338231
DBNL	0.451981	0.0764507	0.613752	0.459398	0.0798831	0.710404	0.283423	0.0893645	0.503308	0.0563787	0.176154	0.160306
SEPTIN9	0.479509	0.0718864	0.635012	0.531916	0.0675235	0.760906	0.463304	0.061167	0.660765	0.0663017	0.169631	0.175289
RABEPK	0.485212	0.0709588	0.641629	0.344816	0.101899	0.629797	0.388109	0.0719524	0.597743	0.0228249	0.209455	0.0958334
RP2	0.485937	0.0708413	0.641629	0.806404	0.0264986	0.917927	0.661281	0.0365633	0.80673	0.0177932	0.217858	0.0817286
FADD	0.490682	0.0700744	0.646499	0.07935	0.188044	0.294028	0.389092	0.0718039	0.598273	0.0107021	0.234173	0.0603903
SNX9	0.499277	0.0686953	0.651599	0.245425	0.125122	0.534596	0.571101	0.0472581	0.741528	0.0189118	0.215828	0.0848298
MZT1	0.556577	0.0597961	0.705608	0.902328	0.0132713	0.962164	0.627683	0.0404695	0.783733	0.076775	0.163557	0.190075
ARHGEF12	0.565401	0.0584665	0.711559	0.149657	0.15487	0.414613	0.0157899	0.199465	0.0637486	0.172671	0.126378	0.314825
TBC1D23	0.565648	0.0584294	0.711559	0.652059	0.0487347	0.837807	0.0160864	0.198915	0.0645887	0.0855589	0.158959	0.202545
FOXO1	0.571099	0.057613	0.714729	0.590648	0.0581226	0.801031	0.545071	0.0504856	0.722559	0.215206	0.114939	0.362355
SESTD1	0.581741	0.0560299	0.721873	0.689388	0.0432045	0.859203	0.0826403	0.144125	0.222634	0.590553	0.0500317	0.720145
REN	0.587138	0.0552321	0.725493	0.00333661	0.309563	0.041123	0.459963	0.0616239	0.658087	0.433584	0.0727667	0.583233
MSLN	0.590034	0.0548054	0.728456	0.646483	0.0495713	0.835211	0.485578	0.058165	0.676845	0.105442	0.149796	0.229151
SIRT2	0.599227	0.0534572	0.735155	0.142072	0.157776	0.400915	0.686774	0.0336519	0.826787	0.0448602	0.185036	0.137882
NCK2	0.603463	0.0528389	0.738183	0.145483	0.156455	0.407086	0.607436	0.042866	0.76963	0.103802	0.150497	0.226727
STK11	0.609079	0.0520224	0.743188	0.185619	0.142417	0.467942	0.566707	0.0477979	0.738184	0.0728273	0.165763	0.183139
MAP3K5	0.609846	0.0519111	0.743352	0.785406	0.0294399	0.908	0.000617069	0.280086	0.00453277	0.0991523	0.152535	0.22107
CEACAM21	0.630894	0.0488808	0.763332	0.744342	0.0352567	0.888822	0.213649	0.103534	0.423101	0.00822834	0.242212	0.051392
SULT1A1	0.633796	0.0484664	0.763529	0.469488	0.0781042	0.71686	0.140505	0.122575	0.322116	0.0249364	0.206398	0.100398
CCL28	0.63501	0.0482933	0.763997	0.768853	0.0317736	0.899286	0.0179781	0.195603	0.0703481	0.0025172	0.275655	0.0234324
COMT	0.63979	0.047613	0.768483	0.544349	0.0654934	0.769637	0.97776	0.00232714	0.990176	0.0256414	0.205426	0.101642
VPS53	0.647949	0.0464565	0.775514	0.706404	0.0407209	0.867625	0.138784	0.123105	0.319772	0.150136	0.133302	0.288147
CASP3	0.649437	0.0462463	0.775614	0.311149	0.109205	0.604625	0.193199	0.1083	0.392779	0.0500502	0.180825	0.148978
MAEA	0.684568	0.0413359	0.803791	0.512026	0.0708212	0.744671	0.115142	0.130953	0.27972	0.0496841	0.18111	0.148342
INPPL1	0.689939	0.0405938	0.80733	0.189451	0.141198	0.473464	0.373406	0.0742024	0.583983	0.33597	0.0893478	0.487123
USO1	0.70768	0.0381572	0.818879	0.206028	0.136121	0.489785	0.100915	0.136301	0.257844	0.0728977	0.165723	0.183139
HEBP1	0.715792	0.0370502	0.821981	0.150574	0.154526	0.415619	0.0322511	0.177331	0.11	0.0778026	0.162998	0.191267
CIAPIN1	0.732752	0.0347496	0.834904	0.367738	0.0971789	0.644324	0.580952	0.046055	0.749392	0.0224562	0.210013	0.0951298
CETN2	0.737288	0.0341374	0.836813	0.513078	0.0706451	0.74545	0.152989	0.118871	0.338011	0.120235	0.143824	0.249252
AKT3	0.745328	0.0330551	0.84072	0.774714	0.0309458	0.90361	0.880478	0.0125515	0.933154	0.284566	0.0993258	0.437553
STK4	0.792988	0.02671	0.872943	0.762758	0.0326366	0.897509	0.322105	0.0825142	0.543598	0.062385	0.172103	0.170104
TIA1	0.824349	0.0225914	0.891369	0.491157	0.0743526	0.729511	0.859511	0.0147745	0.92431	0.0594307	0.174054	0.165129
MMP10	0.869316	0.0167471	0.919602	0.192327	0.140295	0.476483	0.162222	0.116276	0.352023	0.376988	0.0820654	0.528207
SPRY2	0.873719	0.0161782	0.922612	0.833131	0.0227822	0.931844	0.7577	0.0257489	0.867808	0.124741	0.142119	0.254445
PSME1	0.875969	0.0158875	0.923968	0.329159	0.105237	0.616024	0.768235	0.024596	0.873237	0.0173667	0.218662	0.0807986
PFKFB2	0.881528	0.0151701	0.927185	0.307534	0.110019	0.601101	0.737706	0.0279507	0.855681	0.0244971	0.207015	0.0997286
IL5	0.885365	0.0146754	0.928249	0.450263	0.0815122	0.705687	0.749661	0.026632	0.862701	0.937896	0.00724965	0.963336
OPTC	0.896796	0.0132035	0.9363	0.929142	0.00961661	0.974756	0.96312	0.00385993	0.983647	0.188726	0.121842	0.334332
IRAK4	0.912534	0.0111812	0.947907	0.408638	0.0891826	0.670828	0.795147	0.0216711	0.888801	0.179407	0.124438	0.322513
SUGT1	0.922274	0.00993203	0.950872	0.6483	0.0492983	0.835211	0.991413	0.000898466	0.994816	0.127894	0.140954	0.258709
PPME1	0.934199	0.0084045	0.959111	0.542723	0.0657576	0.769383	0.988133	0.00124166	0.992891	0.0306106	0.199159	0.112973
DNAJB8	0.960511	0.00504021	0.975617	0.205081	0.136403	0.488402	0.317362	0.0833239	0.537768	0.0931774	0.155267	0.213279

## Sheet: Table S4 - multivariable
	Variable	MATCHR - immuno			MATCHR mCRPC			TRACERx Baseline			TRACERx Relapse
		HR	95% CI	p-value	HR	95% CI	p-value	HR	95% CI	p-value	HR	95% CI	p-value
	Skeletal Muscle Index at L3*	1.03	1.00, 1.06	0.063				1.00	0.99, 1.01	0.8	0.99	0.98, 1.01	0.3
	Sarcopenia probability	4.13	1.38, 12.3	0.011	26.2	1.84, 372	0.016	4.96	1.93, 12.8	<0.001	3.77	1.23, 11.5	0.020
	ECOG PS	1.52	0.95, 2.42	0.079	3.09	1.62, 5.87	<0.001
	Age	1.00	0.98, 1.02	0.8	0.99	0.94, 1.04	0.7	1.01	0.98, 1.04	0.5	1.00	0.97, 1.03	>0.9
	Sex
	M	1.06	0.63, 1.80	0.8				1.22	0.70, 2.11	0.5	1.71	0.84, 3.52	0.14
	*not included in mCRPC due to high missing rate (> 50%)
	Abbreviations: CI = Confidence Interval, HR = Hazard Ratio

## Sheet: Table S5 - reduced models
Model	rmse_with_CV	Trx_RMSE	Trx_cor	Trx_pval	nb_prot
23P	0.0470	0.051	0.984	<2e-16	23
22P	0.0467	0.052	0.984	<2e-16	22
21P	0.0463	0.051	0.984	<2e-16	21
20P	0.0460	0.052	0.984	<2e-16	20
19P	0.0457	0.049	0.985	<2e-16	19
18P	0.0453	0.049	0.986	<2e-16	18
17P	0.0450	0.048	0.985	<2e-16	17
16P	0.0450	0.048	0.984	<2e-16	16
15P	0.0447	0.051	0.985	<2e-16	15
14P	0.0444	0.049	0.985	<2e-16	14
13P	0.0441	0.048	0.985	<2e-16	13
12P	0.0440	0.047	0.985	<2e-16	12
11P	0.0449	0.054	0.982	<2e-16	11
10P	0.0449	0.055	0.982	<2e-16	10
9P	0.0446	0.052	0.986	<2e-16	9
8P	0.0500	0.061	0.978	<2e-16	8
7P	0.0496	0.061	0.982	<2e-16	7
6P	0.0508	0.069	0.975	<2e-16	6
5P	0.0500	0.069	0.977	<2e-16	5
4P	0.0520	0.068	0.967	<2e-16	4
3P	0.0980	0.075	0.953	<2e-16	3
Importance of variables in reduced models
Variable	P23_Importance	P22_Importance	P21_Importance	P20_Importance	P19_Importance	P18_Importance	P17_Importance	P16_Importance	P15_Importance	p14_Importance	P13_Importance	P12_Importance	P11_Importance	P10_Importance	P9_Importance	P8_Importance	P7_Importance	P6_Importance	P5_Importance	P4_Importance	P3_Importance
CNTN3	0.400254835143015	0.406903992088657	0.398394166146898	0.397083423268115	0.34763710084193	0.379394940762441	0.34829899213542	0.380425949352658	0.280706671425073	0.388278564226458	0.35755398614164	0.352510575612251	0.403144082990298	0.406788927285103	0.325023935543278	0.40433019987676	0.366140269509016	0.421021364183019	0.414611008570226	0.314682725524042	0.369119183340868
ITGA11	0.075547770483119	0.0767467457206631	0.0749900008516983	0.0711985368814268	0.0524434834147564	0.0507705653136371	0.0514691754923935	0.0520369231981838	0.0505994682861922	0.0502750752446672	0.0521727031139581	0.0476015965209656	0.0780828847920883	0.0783518903967301	0.0683473780788132	0.0777829209161715	0.058986180900441	0.0825274579834645	0.0847587939640002	0.129077376197265	NA
CBLN4	0.36863015977245	0.377351938981188	0.364772017610848	0.362841085051486	0.32109918280585	0.298367188615335	0.300155279988887	0.344152818371154	0.261088153674331	0.341131727804762	0.325603337415015	0.330237404615496	0.386114727570105	0.384998031632436	0.247663689535103	0.385093625522301	0.346310945204663	0.382718181772722	0.387906368989212	0.324430323930413	0.322201503205294
PAMR1	0.00587848093779332	0.00605013500916317	0.00590790456433168	0.00583110392327505	0.00633296182553287	0.00655796537792705	0.00659767507403279	0.00658834968490529	0.0063823366224332	0.00661453167969044	0.00609966243778058	0.0063870959205621	0.0068982956587922	0.00680186346435499	0.00871912034873488	NA	NA	NA	NA	NA	NA
LRRN1	0.00391793794679833	0.00418003642980185	0.00412630331842686	0.0040446524357342	0.0266613369179291	0.0131728492083139	0.0120981079064589	0.00397480713974454	0.039197569572795	0.01223883176732	0.0315171253283276	0.00887545927516465	0.00366168601505628	0.00432744742609202	0.0889638986342574	0.00473903463779746	0.0189228313691248	0.00740589782943488	NA	NA	NA
MSTN	0.0926063731996364	0.0807673785958724	0.104502609677058	0.100168315451052	0.146192527125744	0.109408106441034	0.146620848312979	0.111056470539888	0.139513333169307	0.0960417175845179	0.12331908039672	0.107603630496357	0.0812435465703177	0.0817530814938313	0.108797343468254	0.0869874268570792	0.120247987504569	0.0755985245482531	0.0818022471147749	0.23180957434828	0.308679313453839
CNTN5	0.0345175310546183	0.026015004649299	0.0266757173268642	0.0381238149124612	0.0556529765595728	0.0976159949982664	0.0797156848353219	0.0621821463464809	0.095586571271007	0.0625720142375403	0.0792141640780421	0.104271100276068	0.0264913355583718	0.0250047299123618	0.0932139231252572	0.0276846821771008	0.0774367717325609	0.0307285736831071	0.030921581361787	NA	NA
CNDP1	0.000296161955565969	0.000321208264783352	0.000403400514120406	0.00029764598523209	NA	NA	NA	NA	NA	NA	NA	NA	NA	NA	NA	NA	NA	NA	NA	NA	NA
GPC5	0.000336059265509982	0.000403372260082552	0.000803676367233618	0.000517255602288294	0.0138534563558212	0.00260011753192264	0.000803314924128764	NA	NA	NA	NA	NA	NA	NA	NA	NA	NA	NA	NA	NA	NA
WFIKKN1	0.00190440416393839	0.00202214586396971	0.00189415891669961	0.00215315493154963	0.00261807711050449	0.00255829209936961	0.00265764174565211	0.0027003080858695	0.00394829172476095	0.00292495112947724	0.00296658291459415	0.00271817430419083	NA	NA	NA	NA	NA	NA	NA	NA	NA
MDGA1	0.000393665516293559	0.000421554662202567	0.000297098838750729	NA	NA	NA	NA	NA	NA	NA	NA	NA	NA	NA	NA	NA	NA	NA	NA	NA	NA
ITGB1	0.00390133219853398	0.00419300010586926	0.00363468806747756	0.00403212415099188	0.00237332201299187	0.0033668243314496	0.00285409649388529	0.00248487090914061	0.00808333320110428	0.00392908825044105	0.00310556688615423	0.00279818521653143	0.00582201671524701	0.00536211829321153	0.0396316811904549	0.00660015817772872	NA	NA	NA	NA	NA
LAMP2	0.000481221994914944	0.00043084815087529	0.00198173316966305	0.000473154116391954	0.00075162711718244	NA	NA	NA	NA	NA	NA	NA	NA	NA	NA	NA	NA	NA	NA	NA	NA
CDON	0.000368344517248211	0.000307396583344481	0.000392466457778266	0.000382632319262892	0.000777770092914674	0.000929278025088882	NA	NA	NA	NA	NA	NA	NA	NA	NA	NA	NA	NA	NA	NA	NA
PLXDC1	0.00180230745083361	0.001103466531729	0.0011939111252425	0.00224279720357085	0.00176000426585865	0.00201142257555778	0.00304256491117053	0.00136111832571833	0.0238129423522927	0.00149848220344704	0.00372760594468199	0.0158381056114361	0.00215382707283691	NA	NA	NA	NA	NA	NA	NA	NA
ROBO2	0.00033164577564326	0.000393324305662031	0.000532278665094962	0.000423017259524084	0.000848132805354846	0.00193017084685354	0.00159742213074412	0.000953015185049517	0.00374267947318701	NA	NA	NA	NA	NA	NA	NA	NA	NA	NA	NA	NA
L1CAM	0.0017932435376893	0.0019525497674701	0.00173474775262134	0.00169197220364146	0.000843741118951165	0.00101579194763936	0.000863889959455542	0.000773022849696231	0.0012328417207808	0.00103074216568792	0.00114989741833301	NA	NA	NA	NA	NA	NA	NA	NA	NA	NA
IDS	0.000272775885453022	0.000298358333560947	NA	NA	NA	NA	NA	NA	NA	NA	NA	NA	NA	NA	NA	NA	NA	NA	NA	NA	NA
CNTN4	0.000237072287068957	NA	NA	NA	NA	NA	NA	NA	NA	NA	NA	NA	NA	NA	NA	NA	NA	NA	NA	NA	NA
CD34	0.00276176099039363	0.00230949461653147	0.00293470642734224	0.00272144965228192	0.00259866659891598	0.0022635433709827	0.00152578305070898	0.0023516726504119	0.00769007930517187	0.0029871405873965	0.00185948662116879	0.00554681881019825	0.0031061245130577	0.00319408951540838	NA	NA	NA	NA	NA	NA	NA
DPP4	0.000590859267545758	0.00458201086122153	0.000599610533279597	0.000794808765278145	0.00500370326858426	0.0173919551141718	0.0299315250464327	0.0157243783127794	0.0671592615817286	0.019809430529944	NA	NA	NA	NA	NA	NA	NA	NA	NA	NA	NA
ITGAV	0.00270563328390021	0.00274367519826523	0.00371113918412837	0.00452800475779815	0.0115466683134314	0.00968807770600638	0.0109416639704875	0.0125209777452321	0.0112564666198365	0.0106677025886506	0.0117108013035848	0.0156118533407793	0.00328147254382917	0.00341782058047015	0.0196390300758478	0.00678195183506096	0.0119550137796253	NA	NA	NA	NA
ITGB5	0.000470423372036826	0.000502363019788031	0.000517664484441307	0.000451051128638234	0.00100526144817309	0.000956915734002712	0.000826334021842103	0.000713171303087851	NA	NA	NA	NA	NA	NA	NA	NA	NA	NA	NA	NA	NA

## Sheet: Table S6 - scRNA
H_type	Biopsy_Site	Gender	Stage	Age
LUSC	Liver	Male	IV	57
LUSC	soft tissue	Male	IV	59
LUAD	LN	Male	IV	39
LUAD	Liver	Male	IV	52
LUAD	Adrenal	Male	IV	63
LUSC	Lung	Male	IV	66
LUAD	Liver	Female	IV	58
LUAD	Lung	Female	IV	54
LUAD	LN	Male	IV	54
LUAD	Lung	Female	IV	61
LUSC	LN	Male	IV	64
LUSC	soft tissue	Male	IV	73
LUAD	LN	Male	IV	75
LUAD	soft tissue	Male	IV	53
LUAD	soft tissue	Male	IV	68
LUAD	Adrenal	Male	IV	57
